# Supplementary material for: Fabrication of nickel oxyhydroxide/palladium (NiOOH/Pd) thin films for gasochromic application
Source: Royal Society of Chemistry journal article supplement (doi:10.1039/c6tc01541g), 2016-01-01
Supplement: c6tc01541g1.pdf [file c6tc01541g1.pdf]

Supporting information

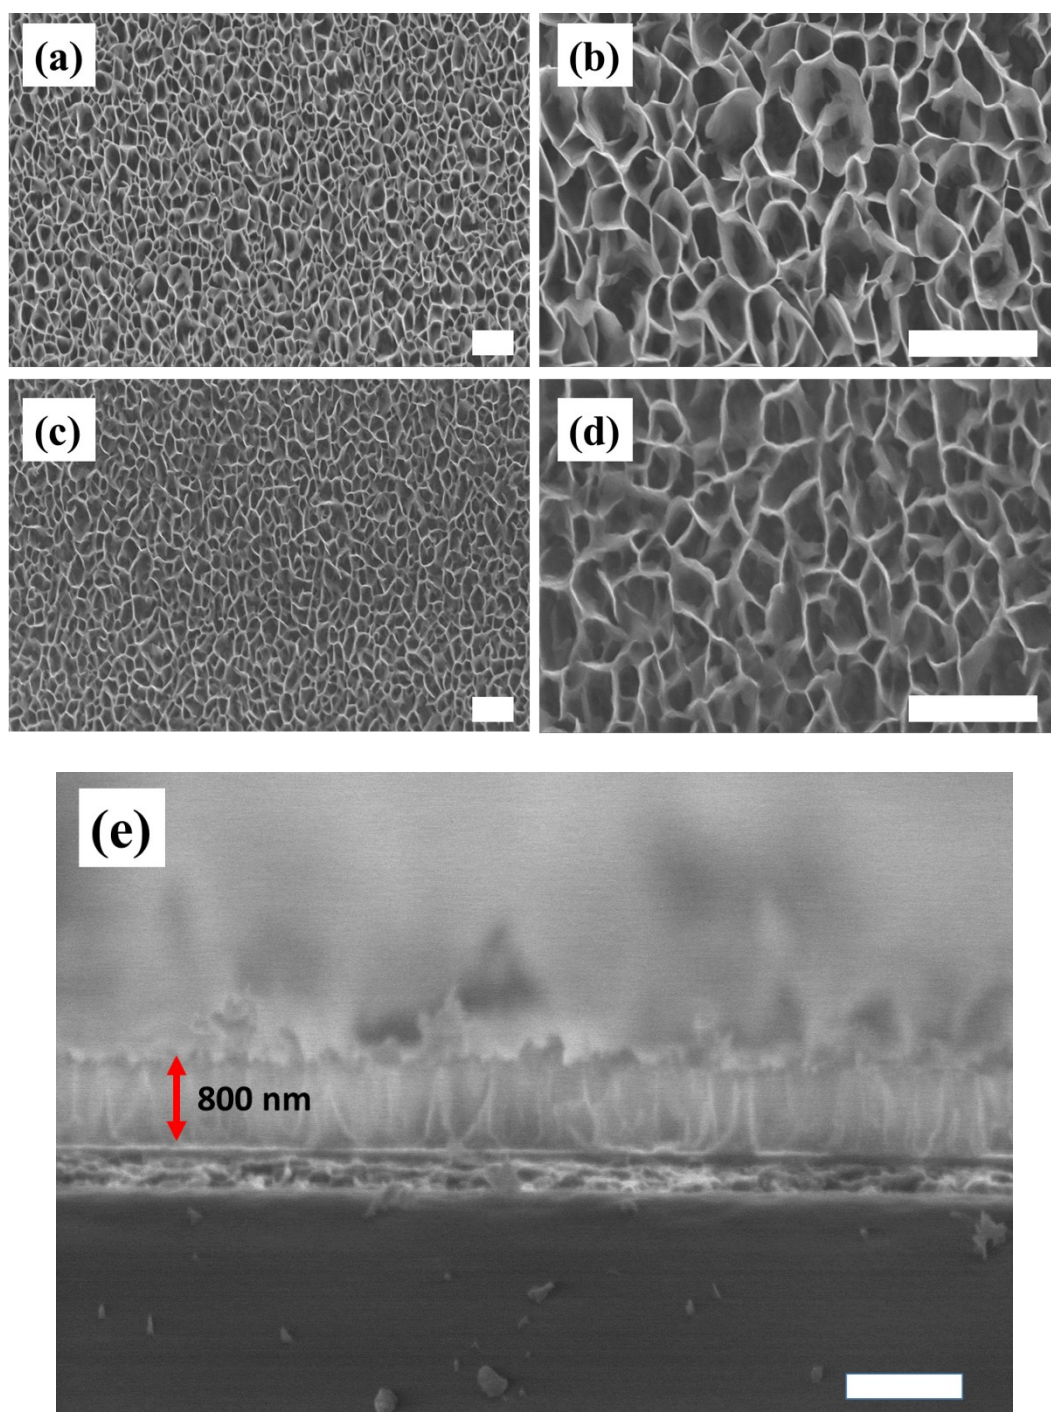

[Fig. S1]

S1 SEM images of (a, b) as-anneal thin film, (c, d) CV-treated NiOOH surface, (e) the cross section of NiOOH/Pd film. The scale bar is refer to 1 μm.
